# Supplementary material for: CXCL11-dependent induction of FOXP3-negative regulatory T cells suppresses autoimmune encephalomyelitis
Source: JCI journal article supplement (doi:10.1172/jci71951), 2014-04-07
Supplement: sd1 [file 1]

**Fig 1s**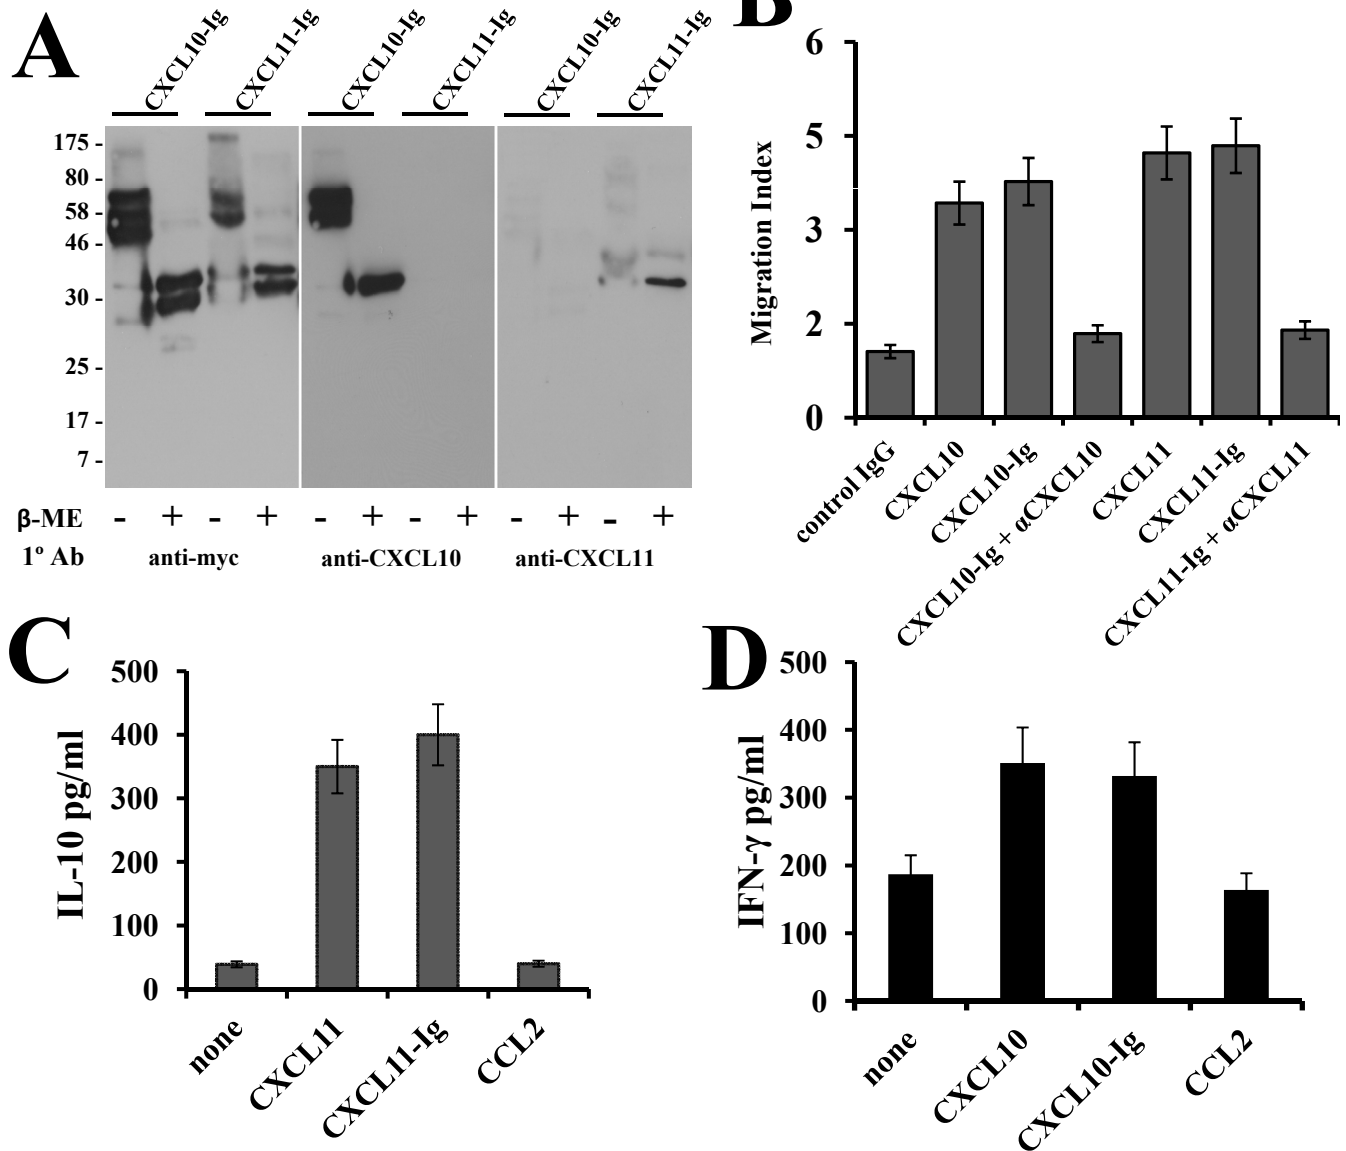**Fig 1s: CXCL11-Ig and CXCL10-Ig preserve the biological properties of CXCL11 and CXCL10**

Western blot analyses: CXCL10-Ig and CXCL11-Ig fusion proteins were expressed in CHO cells and were purified from culture media on High-Trap Protein A affinity column, and were subjected to Western blot analysis under reducing and non-reducing conditions (+/-  $\beta$ -Mercaptoethanol), using either anti-myc (9E10) mAb (left panel), anti-CXCL10 (middle panel) or anti-CXCL11 (right panel) as primary antibodies. (B) CXCL11-Ig and CXCL10-Ig preserve the biological properties of each relative chemokine: Each fusion protein, as well as its corresponding recombinant chemokine (R&D) was tested for its ability to induce the migration of our MOG35-55 Th1 line in a Transwell system. Lower chambers were supplemented with 10ng/ml of recombinant CXCL10 or CXCL11, 100ng/ml of purified CXCL10-Ig or CXCL11-Ig, or 100ng/ml of purified CXCL10-Ig or CXCL11-Ig in with 10 $\mu$ g/ml of neutralizing antibodies. Results are presented as migration index  $\pm$  SE and represent mean of three experiments. (C) CXCL11 and CXCL11-Ig induce IL-10 production in CD4<sup>+</sup> T cells undergoing anti CD3 induced activation: CXCL11, CXCL11-Ig or CCL2 were each added to isolated naïve spleen CD4<sup>+</sup> T cells undergoing anti CD3 induced activation. Direct ELISA then detected IL-10 production by these cells. (D) comparative analysis of IFN- $\gamma$  induction by CXCL10 and CXCL10-Ig

## Fig 2s

| <b>Figure 1B</b>                                   | <b>Medium</b> | <b>CXCL10</b>     | <b>CXCL11</b>       |
|----------------------------------------------------|---------------|-------------------|---------------------|
| IFN $\gamma$ <sup>high</sup> /IL-4 <sup>low</sup>  | 13.9±1.98     | 21.3±2.7**        | 3.2±1.36**          |
| IFN $\gamma$ <sup>low</sup> /IL-17 <sup>high</sup> | 2.85±0.84     | 7.67±3.1**        | 2.12±1.48           |
| IL-10 <sup>high</sup> /IL4 <sup>low</sup>          | 0.74±0.07     | 0.63±0.05         | 8.34±1.22**         |
| IL-4 <sup>high</sup> /IL10 <sup>low</sup>          | 6.31±1.48     | 6.42±2.01         | 8.37±1.41*          |
|                                                    |               | <b>*p&lt;0.05</b> | <b>**P&lt;0.001</b> |

  

| <b>Figure 5C</b>                                   | <b>IgG</b> | <b>CXCL10-Ig</b>  | <b>CXCL11-Ig</b>    |
|----------------------------------------------------|------------|-------------------|---------------------|
| IFN $\gamma$ <sup>high</sup> /IL-4 <sup>low</sup>  | 9.32±2.12  | 15.65±1.54**      | 3.21±0.94**         |
| IFN $\gamma$ <sup>low</sup> /IL-17 <sup>high</sup> | 2.41±0.33  | 3.19±0.43*        | 1.43±1.43**         |
| IL-10 <sup>high</sup> /IL4 <sup>low</sup>          | 1.54±0.09  | 1.2±0.1           | 4.73±2.43**         |
| IL-4 <sup>high</sup> /IL10 <sup>low</sup>          | 0.54±0.07  | 1.98±0.92**       | 5.87±1.33**         |
|                                                    |            | <b>*p&lt;0.05</b> | <b>**P&lt;0.001</b> |

  

| <b>Figure 6A</b>                          | <b>PBS</b> | <b>CXCL10</b>     | <b>CXCL11</b>       |
|-------------------------------------------|------------|-------------------|---------------------|
| IL-10 <sup>high</sup> /IL4 <sup>low</sup> | 1.32±0.09  | 0.44±0.12**       | 9.43±2.43**         |
| IL-4 <sup>high</sup> /IL10 <sup>low</sup> | 0.45±0.1   | 0.81±0.09*        | 4.23±1.43**         |
|                                           |            | <b>*p&lt;0.05</b> | <b>**P&lt;0.001</b> |

  

| <b>Figure 7A</b> | <b>PBS</b> | <b>CXCL10</b> | <b>CXCL11</b>       |
|------------------|------------|---------------|---------------------|
| Spinal cord      | 6.65±1.65  | 3.28±1.12**   | 5.87±1.87           |
| Spleen           | 2.62±1.09  | 2.26±1.02     | 2.31±0.09           |
| Lymph node       | 9.63±2.2   | 3.21±1.56**   | 9.34±1.99           |
|                  |            |               | <b>**P&lt;0.001</b> |

### Fig 2s: Compiled data from different experiments

Fig 1B – Intracellular cytokine analysis of antiCD3/anti-CD28-activated CD4<sup>+</sup> T cells. Compiled flow cytometry data of 3 independent experiments in our in-vitro studies.

Fig 5C - Intracellular cytokine analysis of CD4<sup>+</sup> T cells from treated EAE mice. Compiled flow cytometry data from 6 detected mice in a single representative experiment.

Fig 5D - Mean cytokine concentration in culture media as detected by ELISA prior to administration of cells into EAE recipient mice, representing 3 independent experiments.

Fig 6A - Intracellular cytokine analysis of CD4<sup>+</sup> T cells from pre-EAE mice activated with their target antigen in the presence of CXCL10 or CXCL11. Compiled flow data of 3 independent experiments in our in-vitro studies

Fig 7A – Accumulation of CD4<sup>+</sup>GFP<sup>+</sup> T cells at different sites in treated EAE mice (% of cells). Compiled flow data from 6 detected mice in a single representative experiment.

**Fig 3s**

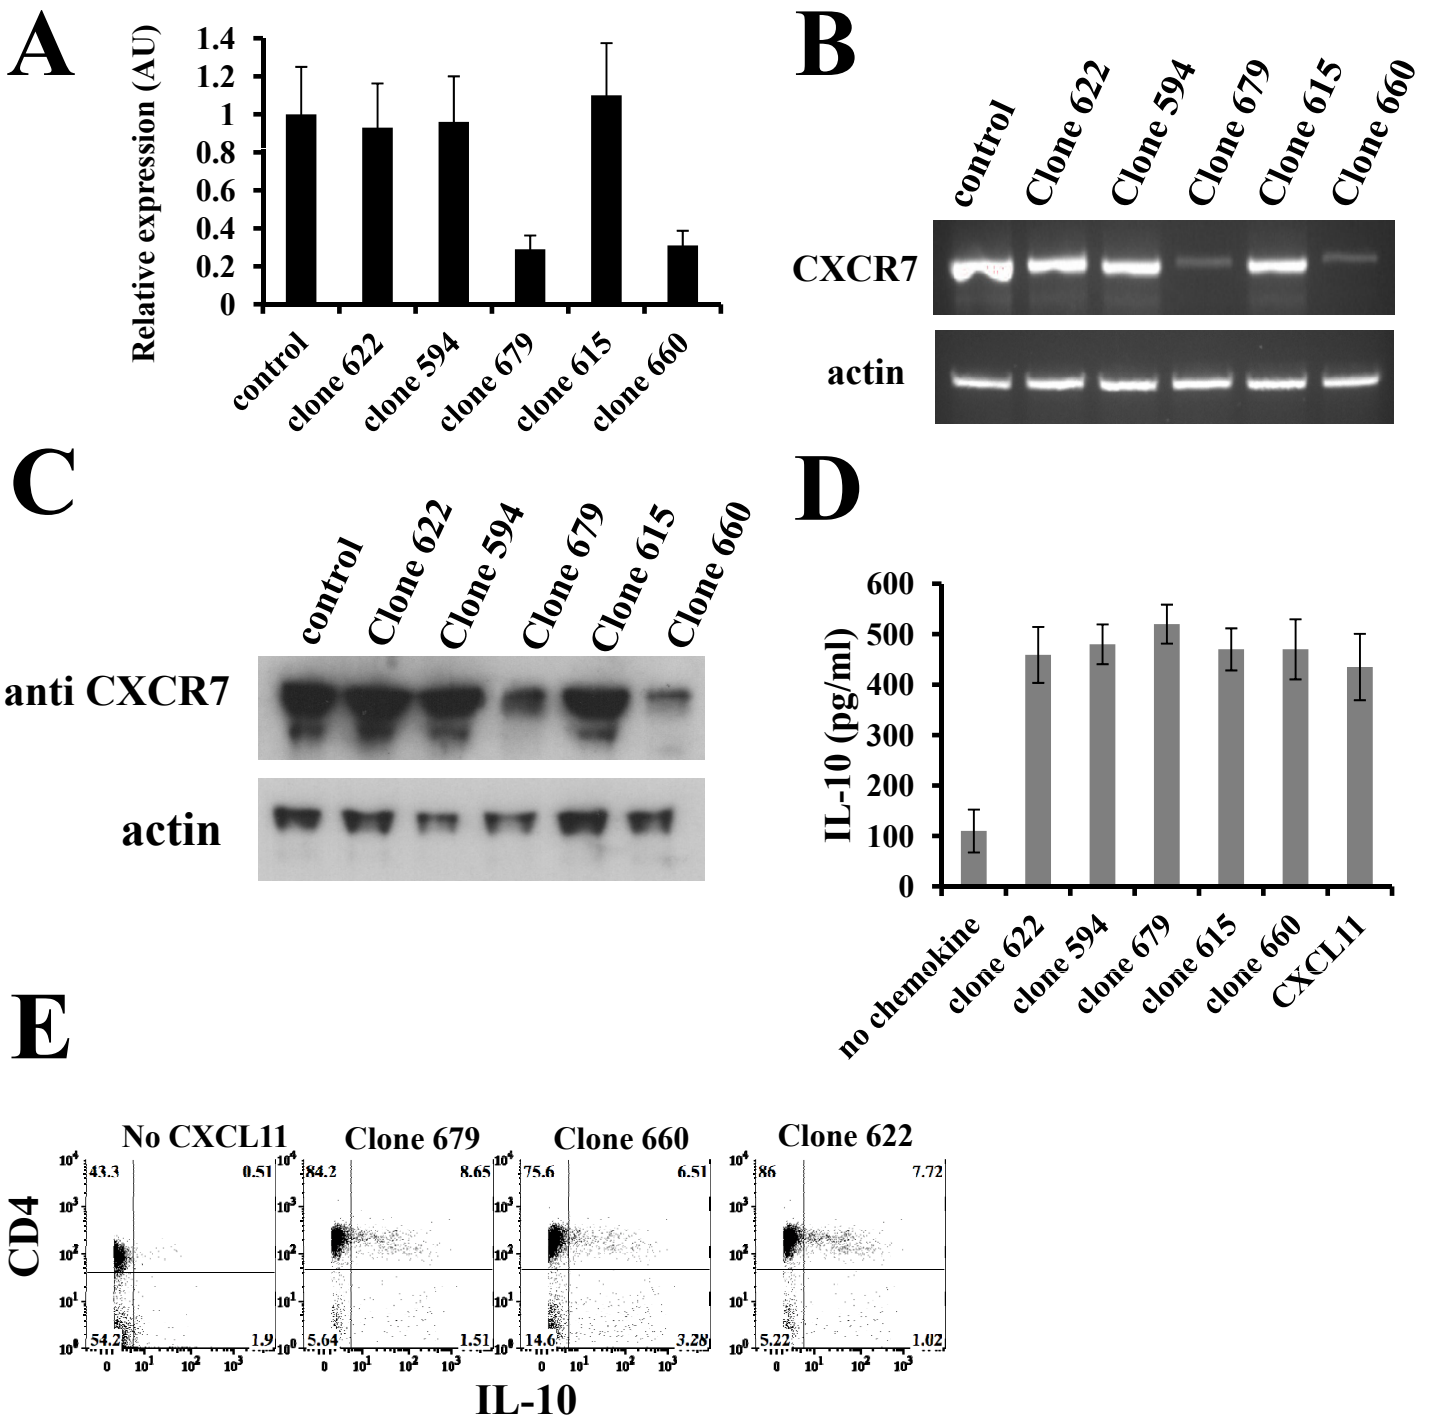

**Fig 3s:** Knockdown of CXCR7 by sh-RNA does not affect IL-10 induction by CXCL11 in CD4<sup>+</sup> T cells undergoing anti CD3& CD28 induced activation. (A) sh-RNA reduces about 80% of the transcription of CXCR7 in CD4<sup>+</sup> T cells undergoing anti CD3& CD28 induced activation seen by Real Time-PCR, regular RT PCR (B) or western blot (C). Knockdown of CXCR7 by sh-RNA does not affect IL-10 induction by CXCL11 in CD4<sup>+</sup> T cells undergoing anti CD3& CD28 induced activation seen by ELISA (D) or flow cytometry analysis (E).
